# Supplementary material
Source: HighWire-hosted journal article supplement (https://www.ajevonline.org/highwire/filestream/12966/field_highwire_adjunct_files/0/22-050.pdf)
Supplement: 22-050.pdf [file 22-050.pdf]

**Supplemental Data for:**

Taylor JA, Bates TR, Jakubowski R and Jones H. 2023. Machine-learning methods to identify key predictors of site-specific vineyard yield and vine size. *Am J Enol Vitic* 74:0740013. DOI: 10.5344/ajev.2022.22050

**Supplemental Table 1** The key predictors and timing of data acquisition (expressed as phenological time) in each year from all models generated in the study. For the random forest regression (RFR), the first five predictors are shown, with the prediction power from the cross-validation given in parentheses. For the stepwise multi-linear regression (S-MLR), the order reflects the stepwise progression, with the dominant predictor at each step given along with the number of times (out of 10) it was selected in the cross-validation process. Acronyms for vegetative indices (VIs) are the same as in Table 2 in the main manuscript. Acronyms for phenological stages are the same as in Table 3 in the main manuscript.

| Predicted variable | Model type | Year                                                                                                      | Order of predictors                                                                                                                         |
|--------------------|------------|-----------------------------------------------------------------------------------------------------------|---------------------------------------------------------------------------------------------------------------------------------------------|
| Yield              | M1 – S-MLR | 2019                                                                                                      | Yield_2018 (6)                                                                                                                              |
|                    |            | 2020                                                                                                      | Yield_2019 (9); ShallowEC <sub>a</sub> _2019; DeepEC <sub>a</sub> _2019; PM_2019                                                            |
|                    |            | 2021                                                                                                      | Yield_2020 (10); PM_2020 (5)                                                                                                                |
|                    | M1 – RFR   | 2019                                                                                                      | Yield_2018 (0.2694); DeepEC <sub>a</sub> _2019 (0.2579); CropLoad2018 (0.192); ShallowEC <sub>a</sub> _2019 (0.1647); PM_2018 (0.1159)      |
|                    |            | 2020                                                                                                      | ShallowEC <sub>a</sub> _2020 (0.3317); Yield_2019 (0.2816); DeepEC <sub>a</sub> _2020 (0.2238); CropLoad_2019 (0.097); PM_2019 (0.0659)     |
|                    |            | 2021                                                                                                      | Yield_2020 (0.4298); DeepEC <sub>a</sub> _2021 (0.1389); ShallowEC <sub>a</sub> _2021 (0.1126); CropLoad_2020 (0.108)                       |
|                    | M2 – S-MLR | 2019                                                                                                      | MSR_3 DBF (10); SR_20 DBF (8); RECI_8 DABB (9); Various VIs at various dates                                                                |
|                    |            | 2020                                                                                                      | DifVI_5 DBF (10); MTCl_Veraison (9); MTCl_1 DAF (6)                                                                                         |
|                    |            | 2021                                                                                                      | DifVI_4 DBF (10); Various VIs 9 DAF (8)                                                                                                     |
|                    | M2 – RFR   | 2019                                                                                                      | DifVI_3 DBF (0.1193); SR_20 DBF (0.0738); NDVI_20 DBF (0.0598); MSR_13 DBF70619 (0.0563); MSR_20 DBF (0.0505)                               |
|                    |            | 2020                                                                                                      | DifVI_13 DBF (0.189); DifVI_5 DBF (0.1036); SR_5 DBF (0.0493); NDVI_5 DBF (0.0418); NDVI_18 DBF (0.0316)                                    |
|                    |            | 2021                                                                                                      | RECI_4 DBF (0.1009); DifVI_4 DBF (0.051); NDRE_4 DBF (0.0406); RECI_11 DBF (0.0263); SR_4 DBF (0.0245)                                      |
| Yield              | M3 – S-MLR | 2019                                                                                                      | MSR_3 DBF (10); SR_20 DBF (8); DeepEC (7); RECI_8 DABB (5)                                                                                  |
|                    |            | 2020                                                                                                      | DifVI_5 DBF (8); MTCl_Veraison (8); DeepEC <sub>a</sub> _2020 (5)                                                                           |
|                    |            | 2021                                                                                                      | DifVI_4 DBF (10); Yield_2020 (10); Various VIs at various dates...                                                                          |
|                    | M3 – RFR   | 2019                                                                                                      | DifVI_3 DBF (0.115); SR_20 DBF (0.0719); NDVI_20 DBF (0.0549); MSR_3 DBF (0.0531); SR_3 DBF0.0449                                           |
| 2020               |            | DifVI_13 DBF (0.1667); DifVI_5 DBF (0.1015); SR_5 DBF (0.0547); NDVI_5 DBF (0.0403); NDVI_18 DBF (0.0341) |                                                                                                                                             |
| Yield              | M4 – S-MLR | 2021                                                                                                      | RECI_4 DBF (0.0911); Yield_2020 (0.0738); DifVI_4 DBF (0.0469); NDRE_4 DBF (0.038); RECI_11 DBF (0.0245); SR_4 DBF (0.0205)                 |
|                    |            | 2019                                                                                                      | SR_29 DAF (10); NDRE_29 DAF90719 (9); Yield_2018 (9)                                                                                        |
|                    |            | 2020                                                                                                      | Yield_2019 (9); ShallowEC (8); DeepEC (8); MSR_090720 (8)                                                                                   |
|                    | M4 – RFR   | 2021                                                                                                      | Yield_2020 (10); PM_2020 (7); CropLoad_2020 (2)                                                                                             |
|                    |            | 2019                                                                                                      | Yield2018 (0.149); SR_29 DAF (0.1447); DeepEC <sub>a</sub> _2019 (0.1319); ShallowEC <sub>a</sub> _2019 (0.1193); MSR_29 DAF (0.1154)       |
| Yield              | M4 – RFR   | 2020                                                                                                      | ShallowEC <sub>a</sub> _2020 (0.2721); Yield_2019 (0.231); DeepEC <sub>a</sub> _2020 (0.1647); CropLoad_2019 (0.0533); MSR_31 DAF (0.0486)  |
|                    |            | 2021                                                                                                      | Yield_2020 (0.3894); ShallowEC <sub>a</sub> _2021 (0.0877); CropLoad_2020 (0.0749); DeepEC <sub>a</sub> _2021 (0.0572); MSR_22 DAF (0.0571) |

(Continued on next page.)

**Supplemental Data for:**

Taylor JA, Bates TR, Jakubowski R and Jones H. 2023. Machine-learning methods to identify key predictors of site-specific vineyard yield and vine size. *Am J Enol Vitic* 74:0740013. DOI: 10.5344/ajev.2022.22050

**Supplemental Table 1** *continued* The key predictors and timing of data acquisition (expressed as phenological time) in each year from all models generated in the study. For the random forest regression (RFR), the first five predictors are shown, with the prediction power from the cross-validation given in parentheses. For the stepwise multi-linear regression (S-MLR), the order reflects the stepwise progression, with the dominant predictor at each step given along with the number of times (out of 10) it was selected in the cross-validation process. Acronyms for vegetative indices (VIs) are the same as in Table 2 in the main manuscript. Acronyms for phenological stages are the same as in Table 3 in the main manuscript.

| Predicted variable | Model type   | Year                                                                                                                                     | Order of predictors                                                                                                                      |
|--------------------|--------------|------------------------------------------------------------------------------------------------------------------------------------------|------------------------------------------------------------------------------------------------------------------------------------------|
| Pruning mass       | M1 – S-MLR   | 2019                                                                                                                                     | PM_2018 (10)                                                                                                                             |
|                    |              | 2020                                                                                                                                     | PM_2019 (10); ShallowEC <sub>a</sub> _2020 (10); DeepEC <sub>a</sub> _2020 (10)                                                          |
|                    |              | 2021                                                                                                                                     | PM_2020 (10); CropLoad_2020 (2)                                                                                                          |
|                    | M1 – RFR     | 2019                                                                                                                                     | PM_2018 (0.4886); CropLoad_2018 (0.3138); Yield_2018 (0.0762); ShallowEC <sub>a</sub> _2019 (0.0624); DeepEC <sub>a</sub> _2019 (0.0591) |
|                    |              | 2020                                                                                                                                     | CropLoad_2019 (0.4063); PM_2019 (0.2971); DeepEC <sub>a</sub> _2020 (0.1247); ShallowEC <sub>a</sub> _2020 (0.0926); Yield_2019 (0.0793) |
|                    |              | 2021                                                                                                                                     | PM_2020 (0.659); CropLoad_2020 (0.0842); Yield_2020 (0.067); DeepEC <sub>a</sub> _2021 (0.053); ShallowEC <sub>a</sub> _2021 (0.0479)    |
|                    |              | 2019                                                                                                                                     | Various VIs at 4 DAV (8) or 25 DBV (2)                                                                                                   |
|                    | M2 – S-MLR   | 2020                                                                                                                                     | NDVI_13 DAV (10); Various VIs at various dates                                                                                           |
|                    |              | 2021                                                                                                                                     | SR/DifVI_4 DBF (9); Various VIs_160921 (7)                                                                                               |
|                    | Pruning mass | M2 – RFR                                                                                                                                 | 2019                                                                                                                                     |
| 2020               |              |                                                                                                                                          | SR_24 DAV (0.0591); MSR_13 DAV (0.0413); SR_18 DBF (0.0292); SR_13 DAV (0.0261); NDVI_13 DAV (0.0257)                                    |
| 2021               |              |                                                                                                                                          | MTCI_17 DAF (0.0286); SR_24 DBV (0.0211); SR_17 DAF (0.0206); MSR_17 DAF (0.0186); MTCI_24 DBV (0.0182)                                  |
| M3 – S-MLR         |              | 2019                                                                                                                                     | PM_2018 (10)                                                                                                                             |
|                    |              | 2020                                                                                                                                     | PM_2019 (10); RECI_5 DBF (10); MSR_13 DAV (6)                                                                                            |
|                    |              | 2021                                                                                                                                     | PM_2020 (10); Various VIs at various dates...                                                                                            |
| M3 – RFR           |              | 2019                                                                                                                                     | PM_2018 (0.3693); CropLoad_2018 (0.2813); DifVI_20 DBF (0.0206); MTCI_4 DAV (0.0119); RECI_20 DBF (0.0105)                               |
|                    |              | 2020                                                                                                                                     | CropLoad_2019 (0.2431); PM_2019 (0.2354); SR_24 DAV (0.022); MSR_13 DAV (0.0174); MTCI_12 DAF (0.0126)                                   |
| M3 – RFR           |              | 2021                                                                                                                                     | PM_2020 (0.2805); CropLoad_2020 (0.137); MTCI_17 DAF (0.0141); Yield_2020 (0.0125); MSR_17 DAF (0.0105); SR_24 DBV (0.0103)              |
|                    |              | 2019                                                                                                                                     | PM_2018 (10)                                                                                                                             |
| M4 – S-MLR         | 2020         | PM_2019 (10); ShallowEC <sub>a</sub> _2020 (10); SR_090720 (8)                                                                           |                                                                                                                                          |
|                    | 2021         | PM_2020 (10); CropLoad_2020 (2)                                                                                                          |                                                                                                                                          |
|                    | 2019         | PM_2018 (0.4658); CropLoad_2018 (0.2837); Yield_2018 (0.0411); SR_29 DAF (0.0329); ShallowEC <sub>a</sub> _2019 (0.0293)                 |                                                                                                                                          |
| M4 – RFR           | 2020         | CropLoad_2019 (0.3704); PM_2019 (0.2813); DeepEC <sub>a</sub> _2020 (0.0734); ShallowEC <sub>a</sub> _2020 (0.0483); Yield_2019 (0.0461) |                                                                                                                                          |
|                    | 2021         | PM_2020 (0.6398); CropLoad_2020 (0.058); Yield_2020 (0.0415); DeepEC <sub>a</sub> _2021 (0.0366); ShallowEC <sub>a</sub> _2021 (0.0306)  |                                                                                                                                          |
